# Supplementary material
Source: PubMed Central journal article supplement (PMC3129186)

## Supporting Information

### Zheng, Y. et al, “Lipoxygenases mediate the effect of essential fatty acid in skin barrier formation: A proposed role in releasing omega-hydroxyceramide for construction of the corneocyte lipid envelope”

#### Additional Experimental Procedures

##### HPLC conditions for the Main Text Figures:

Fig. 2A: Column: Zorbax Eclipse XDB-C8 column (5  $\mu\text{m}$ , 4.6 mm  $\times$  15 cm). Solvent: methanol/hexane (10:1, v/v). Flow rate: 1 ml/min.

Fig. 2C: [Left panel] Column: Beckman Silica Ultrasphere column (5  $\mu\text{m}$ , 4.6 mm  $\times$  25 cm). Solvent: hexane/isopropanol (100:1.5, v/v). Flow rate: 1 ml/min. [Right panel] Column: Chiralpak AD column (5  $\mu\text{m}$ , 4.6 mm  $\times$  25 cm). Solvent: hexane/methanol/ethanol (100:5:5 v/v/v). Flow rate: 1ml/min.

Fig. 2D: Column: Beckman Silica Ultrasphere column (5  $\mu\text{m}$ , 4.6 mm  $\times$  25 cm). Solvent: hexane/isopropanol (100:2, v/v). Flow rate: 1 ml/min.

Fig. 3A: Column: Beckman Silica Ultrasphere column (5  $\mu\text{m}$ , 4.6 mm  $\times$  25 cm). Solvent: hexane/isopropanol/acetic acid (90:10:0.1, v/v/v). Flow rate: 1 ml/min.

Fig. 3B: [Left panel] Column: Beckman Silica Ultrasphere column (5  $\mu\text{m}$ , 4.6 mm  $\times$  25 cm). Solvent: hexane/isopropanol (100:2, v/v). Flow rate: 1 ml/min. [Right panel] Column: Chiralpak AD column (5  $\mu\text{m}$ , 4.6 mm  $\times$  25 cm). Solvent: hexane/methanol/ethanol (100:5:5 v/v/v). Flow rate: 1ml/min.

Fig. 3C: [Left panel] Column: Beckman Silica Ultrasphere column (5  $\mu\text{m}$ , 4.6 mm  $\times$  25 cm). Solvent: hexane/isopropanol (100:2, v/v). Flow rate: 1 ml/min. [Right panel] Column: Chiralpak AD-H column (5  $\mu\text{m}$ , 2.1 mm  $\times$  15 cm). Solvent: hexane/methanol/ethanol (100:5:5 v/v/v). Flow rate: 0.3 ml/min.

Fig. 4A,B: Column: Beckman Silica Ultrasphere column (5  $\mu\text{m}$ , 4.6 mm  $\times$  25 cm). Solvent: hexane/isopropanol/acetic acid (90:10:0.1, v/v/v). Flow rate: 1 ml/min. (A) Injected was 5% of the total extract of free ceramides from the epidermis of one neonatal (P0) mouse (wild-type or 12R-LOX-/-). (B) Injected was 25% of the total extract from the first cycle of room temperature overnight soak of the protein pellet from the epidermis of one neonatal (P0) mouse.

Fig. 4D: [Left panel] Column: Beckman Silica Ultrasphere column (5  $\mu\text{m}$ , 4.6 mm  $\times$  25 cm). Solvent: hexane/isopropanol (100:1.5, v/v). Flow rate: 1 ml/min. [Right panel] Column: Chiralpak AD-H column (5  $\mu\text{m}$ , 2.1 mm  $\times$  15 cm). Solvent: hexane/methanol/ethanol (100:5:5 v/v/v). Flow rate: 0.3 ml/min.

Fig. 5A,B: [Left panel] Column: Waters Symmetry C18 column (5  $\mu\text{m}$ , 4.6 mm  $\times$  25 cm). Solvent: methanol/water/acetic acid (80:20:0.01, v/v/v). Flow rate: 1 ml/min. [Middle panel] Column: Beckman Silica Ultrasphere column (5  $\mu\text{m}$ , 4.6 mm  $\times$  25 cm). Solvent: hexane/isopropanol (100:2:0.02, v/v/v). Flow rate: 1 ml/min. [Right panel] Column: Chiralpak

AD column (5  $\mu\text{m}$ , 2.1 mm  $\times$  15 cm). Solvent: hexane/methanol/ethanol/acetic acid (100:5:5/0.02 v/v/v/v). Flow rate: 0.2 ml/min.

Fig. 6B,C: Column: Beckman Silica Ultrasphere column (5  $\mu\text{m}$ , 4.6 mm  $\times$  25 cm). Solvent: hexane/isopropanol/acetic acid (90:10:0.1, v/v/v). Flow rate: 1 ml/min. Injected was 2% of the total extract of the ester-linked protein-bound lipids from the epidermis of one neonatal (P0) mouse (wild-type or 12R-LOX<sup>-/-</sup>).

### **HPLC conditions for the Supplemental Figures**

Supplemental Fig. S1A: Column: Beckman Silica Ultrasphere column (5  $\mu\text{m}$ , 4.6 mm  $\times$  25 cm). Solvent: hexane/isopropanol/acetic acid (90:10:0.1, v/v/v). Flow rate: 1 ml/min.

Fig. S1B: [Left panel] Column: Beckman Silica Ultrasphere column (5  $\mu\text{m}$ , 4.6 mm  $\times$  25 cm). Solvent: hexane/isopropanol (100:2, v/v). Flow rate: 1 ml/min. [Right panel] Column: Chiralpak AD column (5  $\mu\text{m}$ , 4.6 mm  $\times$  25 cm). Solvent: hexane/methanol/ethanol (100:5:5 v/v/v). Flow rate: 1ml/min.

Fig. S1C,D: Column: Beckman Silica Ultrasphere column (5  $\mu\text{m}$ , 4.6 mm  $\times$  25 cm). Solvent: hexane/isopropanol (100:2, v/v). Flow rate: 1 ml/min.

Supplemental Fig. S2B: Column: Beckman Silica Ultrasphere column (5  $\mu\text{m}$ , 4.6 mm  $\times$  25 cm). Solvent: hexane/isopropanol (100:0.5, v/v). Flow rate: 1 ml/min.

Supplemental Fig. S3A,B: [Left panel] Column: Beckman Silica Ultrasphere column (5  $\mu\text{m}$ , 4.6 mm  $\times$  25 cm). Solvent: hexane/isopropanol (100:1.5, v/v). Flow rate: 0.5 ml/min. [Right panel] Column: Chiralpak AD column (5  $\mu\text{m}$ , 2.1 mm  $\times$  15 cm). Solvent: hexane/methanol/ethanol (100:5:4 v/v/v). Flow rate: 0.2 ml/min.

Supplemental Fig. S4: Column: Beckman Silica Ultrasphere column (5  $\mu\text{m}$ , 4.6 mm  $\times$  25 cm). Solvent: hexane/isopropanol/acetic acid (90:10:0.1, v/v/v). Flow rate: 1 ml/min. (A) and (B): Injected was 1% of the total extract of free ceramides from the epidermis of one neonatal (P0) mouse (wild-type or 12R-LOX<sup>-/-</sup>). (C) Injected was 20% of the total extract from the first cycle of room temperature overnight soak of the protein pellet from the epidermis of one neonatal (P0) mouse.

Supplemental Fig. S5: Column: Beckman Silica Ultrasphere column (5  $\mu\text{m}$ , 4.6 mm  $\times$  25 cm). Solvent: hexane/isopropanol/acetic acid (90:10:0.1, v/v/v). Flow rate: 1 ml/min.

Supplemental Fig. S6A,B: Column: Waters Symmetry C18 column (5  $\mu\text{m}$ , 2.1 mm  $\times$  15 cm). Solvent: methanol/acetic acid (100:0.01, v/v). Flow rate: 0.2 ml/min. Injected was 7% of the total extract of the ester-linked protein-bound lipids from the epidermis of one neonatal (P0) mouse (wild-type or 12R-LOX<sup>-/-</sup>)

## Legends to Supporting Figures

**Fig. S1:** Transformation of EOS by 12*R*-LOX and eLOX3 *in vitro*. (A) SP-HPLC analysis of the oxygenation of EOS by 12*R*-LOX. (B) SP-HPLC analysis (left panel) and chiral HPLC (right panel) of the reduced and transesterified 12*R*-LOX products as methyl esters. (C) SP-HPLC analysis of the transesterified products from reaction of eLOX3 with 9*R*-HPODE-EOS (the 12*R*-LOX products in panel A). (D) SP-HPLC analysis of the products from reaction of eLOX3 with 9*R*-HPODE methyl ester. The major product in this reaction has been identified by GC-MS and NMR as methyl 9*R*,10*R*-epoxy-13*R*-hydroxy-octadeca-11*E*-enoate. (E) Combined mass spectrum of the EOS substrates. (F) Combined mass spectrum of the 12*R*-LOX products after triphenylphosphine reduction. (G) Combined mass spectrum of the eLOX3 products.

**Fig. S2:** Analysis of oxygenated EOS metabolites from pig epidermis. (A) [Top panel] Combined mass spectrum of EOS. [Bottom panel] Combined mass spectrum of epOH-EOS. (B) SP-HPLC analysis of KODE methyl esters transesterified from KODE-EOS. (C) GC-MS analysis of the TMS derivative of the major epOH methyl ester transesterified from epOH-EOS. For interpretation of the prominent ions, see Fig. S1E.

**Fig. S3:** Analysis of transesterified oxygenated EOS metabolites (HODE-EOS and KODE-EOS) from wild-type mouse epidermis (A) and from 12*R*-LOX<sup>-/-</sup> mouse epidermis (B). SP-HPLC analysis of KODE and epOH methyl esters transesterified from the LOX product peak shown in Fig. 4A. Note that very little epoxy-ketone was recovered due to its instability under the alkaline conditions used for transesterification. 9-HODE methyl ester was collected and further analyzed by chiral HPLC (right panel). Identical aliquots were injected in this wild-type vs. 12*R*-LOX<sup>-/-</sup> comparison. Shown are representative chromatograms from three independent experiments on the same aliquots of the extract from three sets of wild-type and 12*R*-LOX<sup>-/-</sup> littermates.

**Fig. S4:** Analysis of free and reversibly bound lipids from mouse epidermis. (A) and (B): Total ion current of SP-HPLC-APCI-MS analysis of free ceramides from wild-type and 12*R*-LOX<sup>-/-</sup> mouse epidermis respectively. The same aliquot was injected in this wild-type vs. 12*R*-LOX<sup>-/-</sup> comparison. (C) Total ion current of SP-HPLC-APCI-MS analysis of reversibly bound epoxy-ketone-EOS from wild-type mouse epidermis. (D) Total ion current of RP-HPLC-ESI-MS analysis of reversibly bound epoxy-ketone acyl acid from wild-type mouse epidermis. (E) Mass spectrum of EOS from mouse epidermis. (F) Mass spectrum of free epoxy-ketone-EOS from mouse epidermis. (G) Mass spectrum of free epOH-EOS from mouse epidermis. Note the pattern similarity between this spectrum and the spectrum of free epoxy-ketone-EOS in (F). (H) Mass spectrum of reversibly bound epoxy-ketone-EOS from mouse epidermis. (I) Mass spectrum of reversibly bound epoxy-ketone acyl acid from mouse epidermis.

**Fig S5:** Stepwise extraction of mouse epidermis reveals lipids reversibly bound to proteins. (A)-(D): First to fourth sonication and extraction by chloroform:methanol (1:1 for A and B, or 2:1 for C and D, v/v) at 0 °C. Sonication lasted for 20 min each time (20 s sonication followed by 20 s interval). After each extraction, the organic phase was removed from the protein pellet by centrifugation. (E): A final soak of the protein pellet in chloroform:methanol (1:1, v/v) at room temperature overnight. For the first extraction, 3% of total extract was injected onto HPLC; for the next four extractions, 25% of total extract was injected. This experiment used epidermis isolated from two neonatal (P0) BALB/c mice.

**Fig. S6:** Analysis of covalently bound FA and  $\omega$ -hydroxy VLFA from mouse epidermis. (A) and (B): Total ion current of RP-HPLC-ESI-MS analysis of covalently bound lipids from wild-type and 12R-LOX<sup>-/-</sup> mouse epidermis respectively. The covalently bound lipids was recovered from mild alkaline hydrolysis of exhaustively extracted protein pellets. (C) Combined mass spectra of  $\omega$ -hydroxy VLFA from wild-type epidermis.

Last page of Supplemental data:

Table S1: <sup>1</sup>H-NMR spectrum of 9R,10R-trans-epoxy-10E-13R-hydroxy-octadecenoate methyl ester.

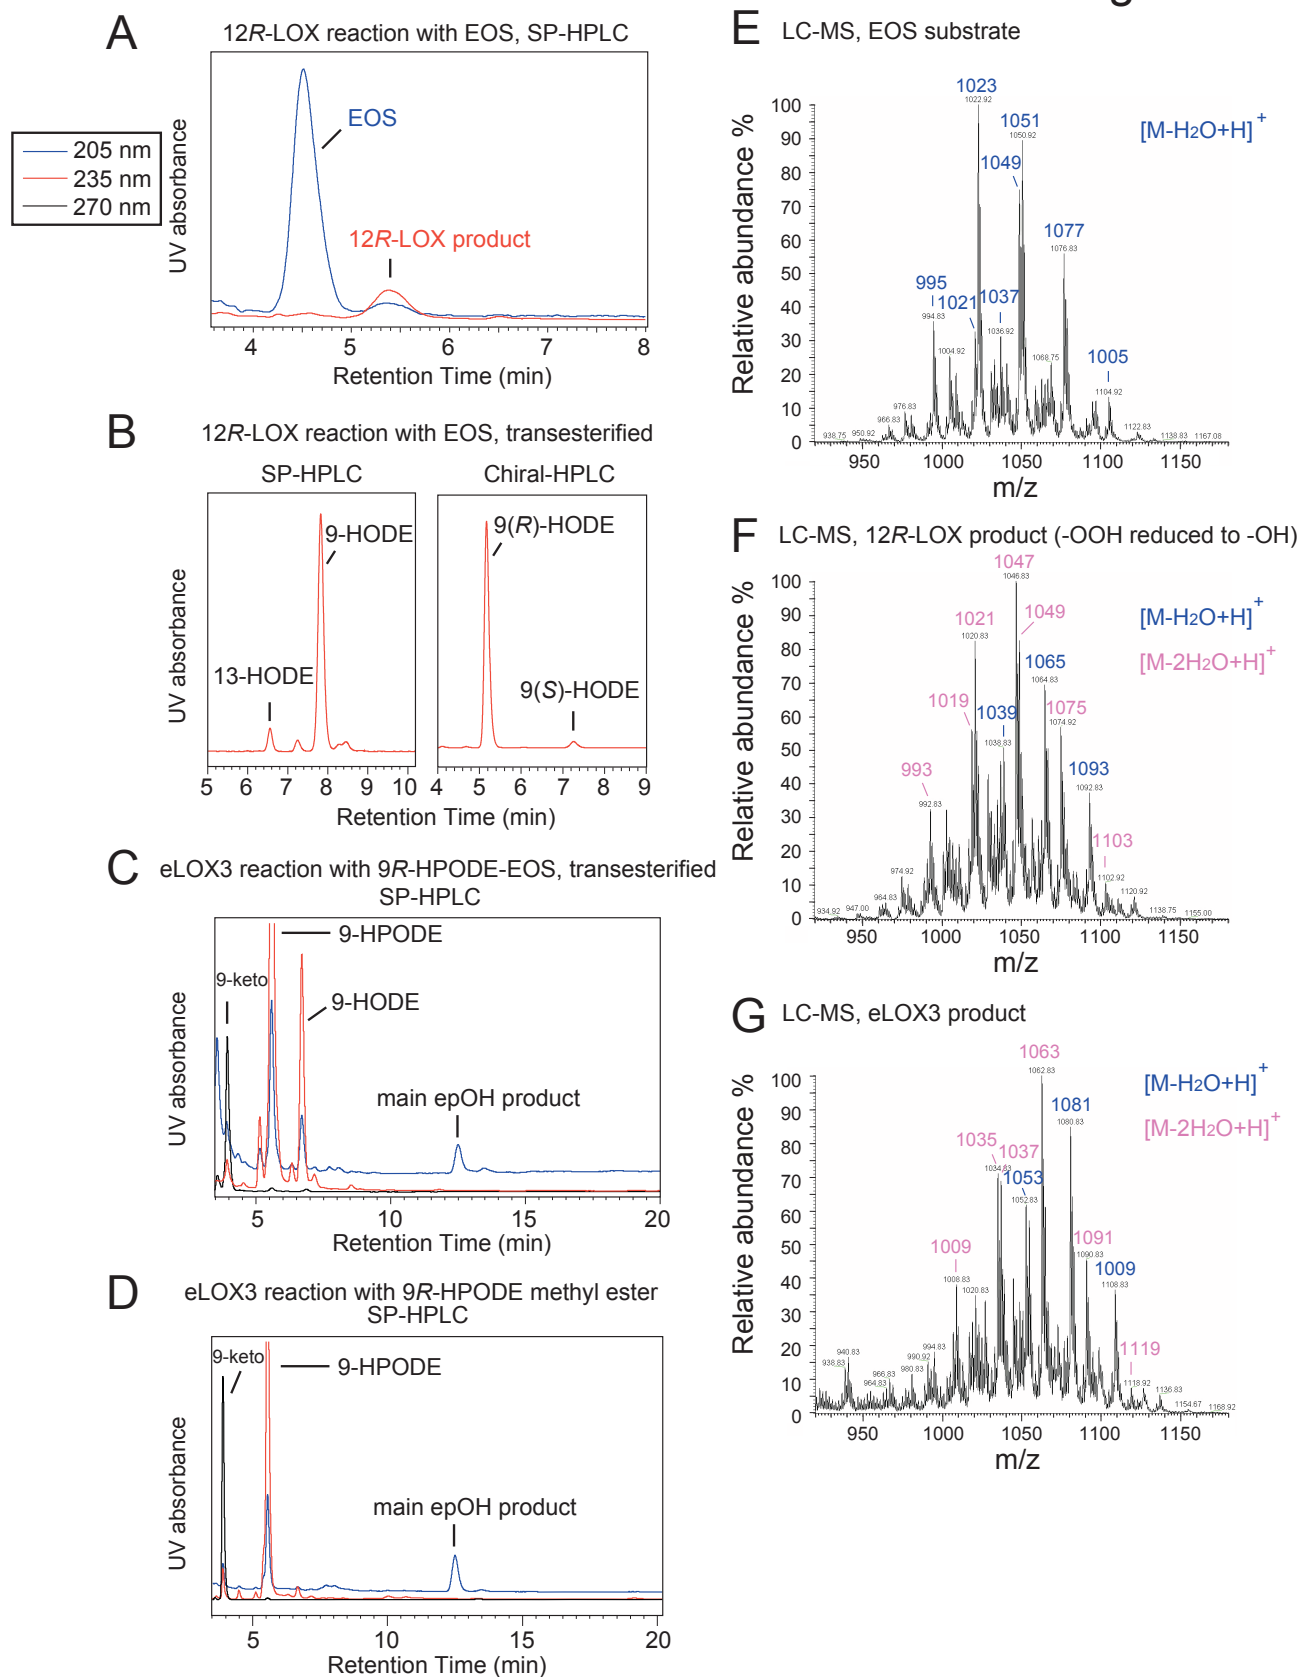

**Fig. S1: Transformation of EOS by 12R-LOX and eLOX3 in vitro.** (A) SP-HPLC analysis of the oxygenation of EOS by 12R-LOX. (B) SP-HPLC analysis (left panel) and chiral HPLC (right panel) of the reduced and transesterified 12R-LOX products as methyl esters. (C) SP-HPLC analysis of the transesterified products from reaction of eLOX3 with 9R-HPODE-EOS (the 12R-LOX products in panel A). (D) SP-HPLC analysis of the products from reaction of eLOX3 with 9R-HPODE methyl ester. The major product in this reaction has been identified by GC-MS and NMR as methyl 9R,10R-epoxy-13R-hydroxy-octadeca-11E-enoate. (E) Combined mass spectrum of the EOS substrates. (F) Combined mass spectrum of the 12R-LOX products after triphenylphosphine reduction. (G) Combined mass spectrum of the eLOX3 products.

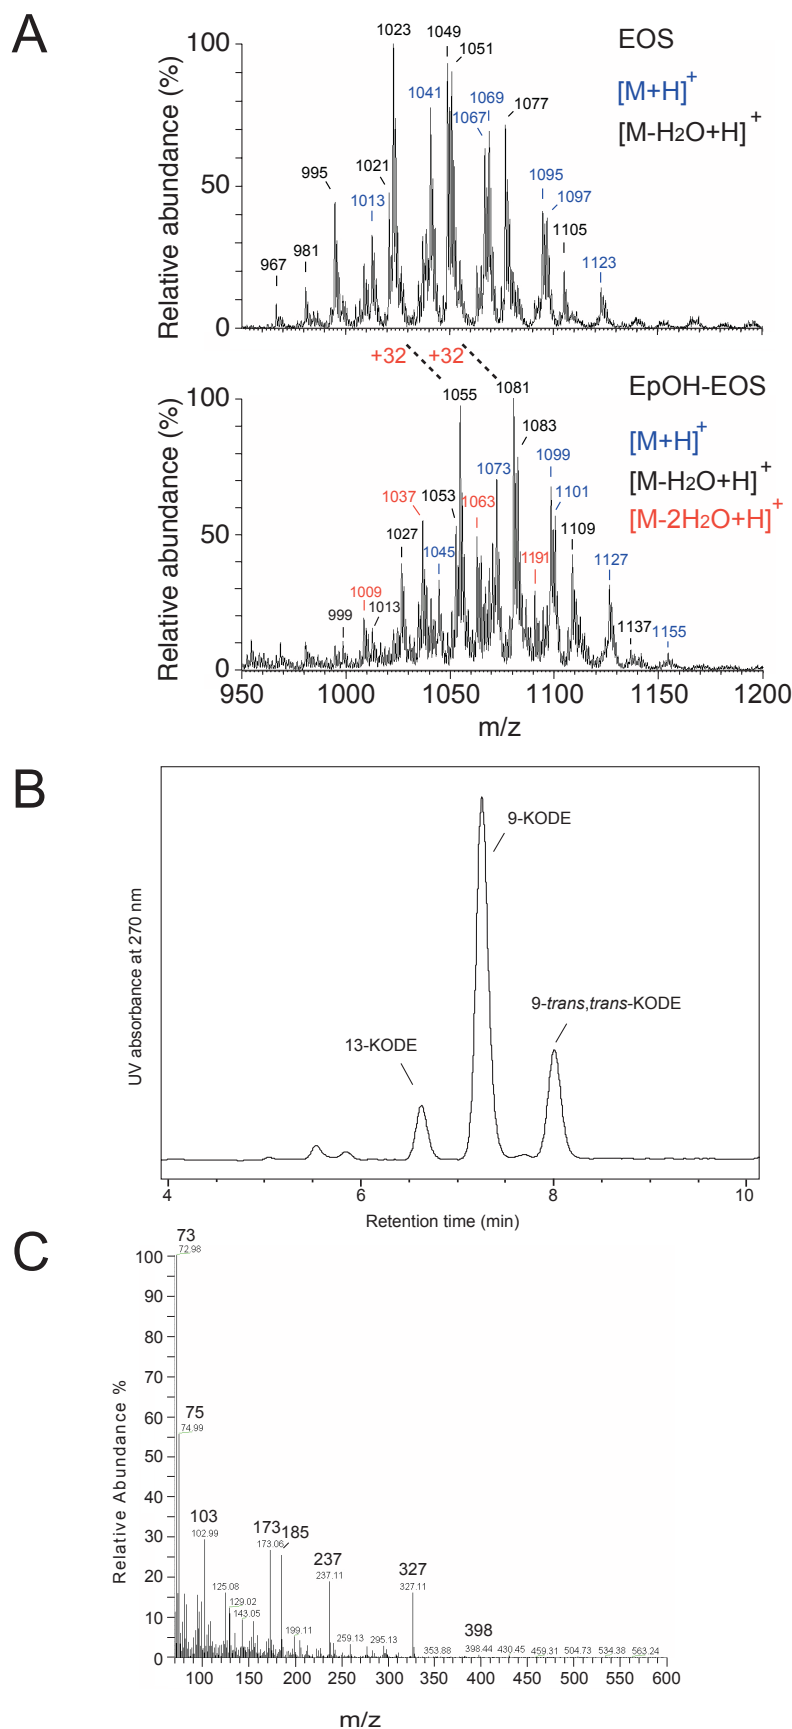

**Fig. S2: Analysis of oxygenated EOS metabolites from pig epidermis. (A)** [Top panel] Combined mass spectrum of EOS. [Bottom panel] Combined mass spectrum of epOH-EOS. **(B)** SP-HPLC analysis of KODE methyl esters transesterified from KODE-EOS. **(C)** GC-MS analysis of the TMS derivative of the major epOH methyl ester transesterified from epOH-EOS. For interpretation of the prominent ions, see Fig. S1E.

**A** Wild-type mouse epidermis,  
Oxygenated EOS, transesterified

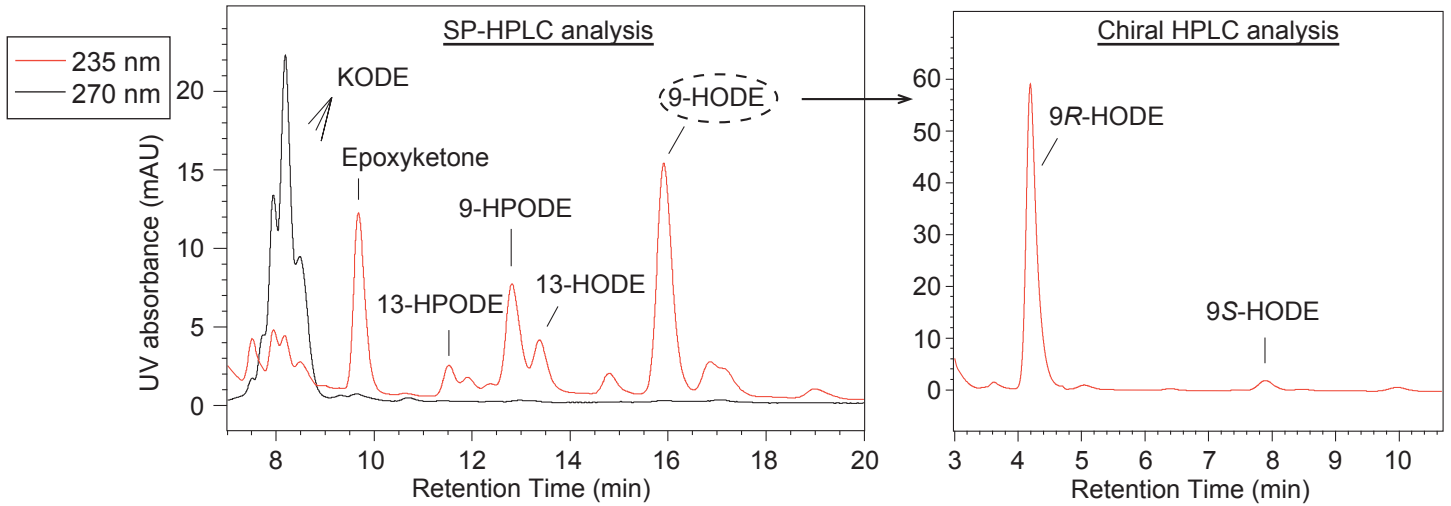

**B** 12R-LOX<sup>-/-</sup> mouse epidermis  
Oxygenated EOS, transesterified

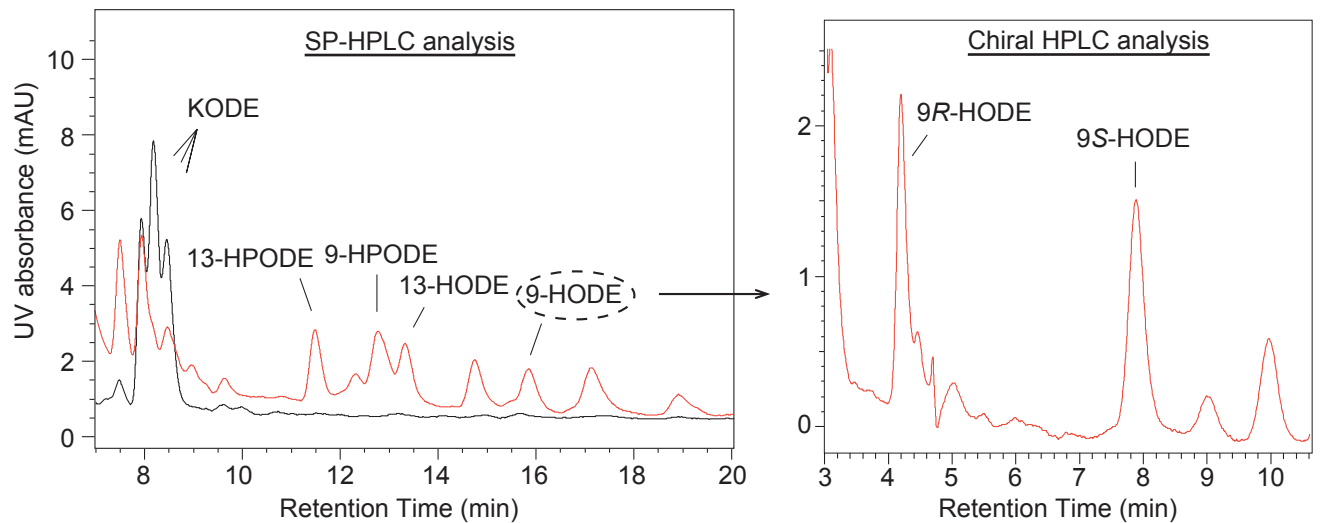

**Fig. S3: Analysis of transesterified oxygenated EOS metabolites (HODE-EOS and KODE-EOS) from wild-type mouse epidermis (A) and from 12R-LOX<sup>-/-</sup> mouse epidermis (B).** SP-HPLC analysis of KODE and epOH methyl esters transesterified from the LOX product peak shown in Fig. 4A. Note that very little epoxy-ketone was recovered due to its instability under the alkaline conditions used for transesterification. 9-HODE methyl ester was collected and further analyzed by chiral HPLC (right panel). Identical aliquots were injected in this wild-type vs. 12R-LOX<sup>-/-</sup> comparison. Shown are representative chromatograms from three independent experiments on the same aliquots of the extract from three sets of wild-type and 12R-LOX<sup>-/-</sup> littermates.

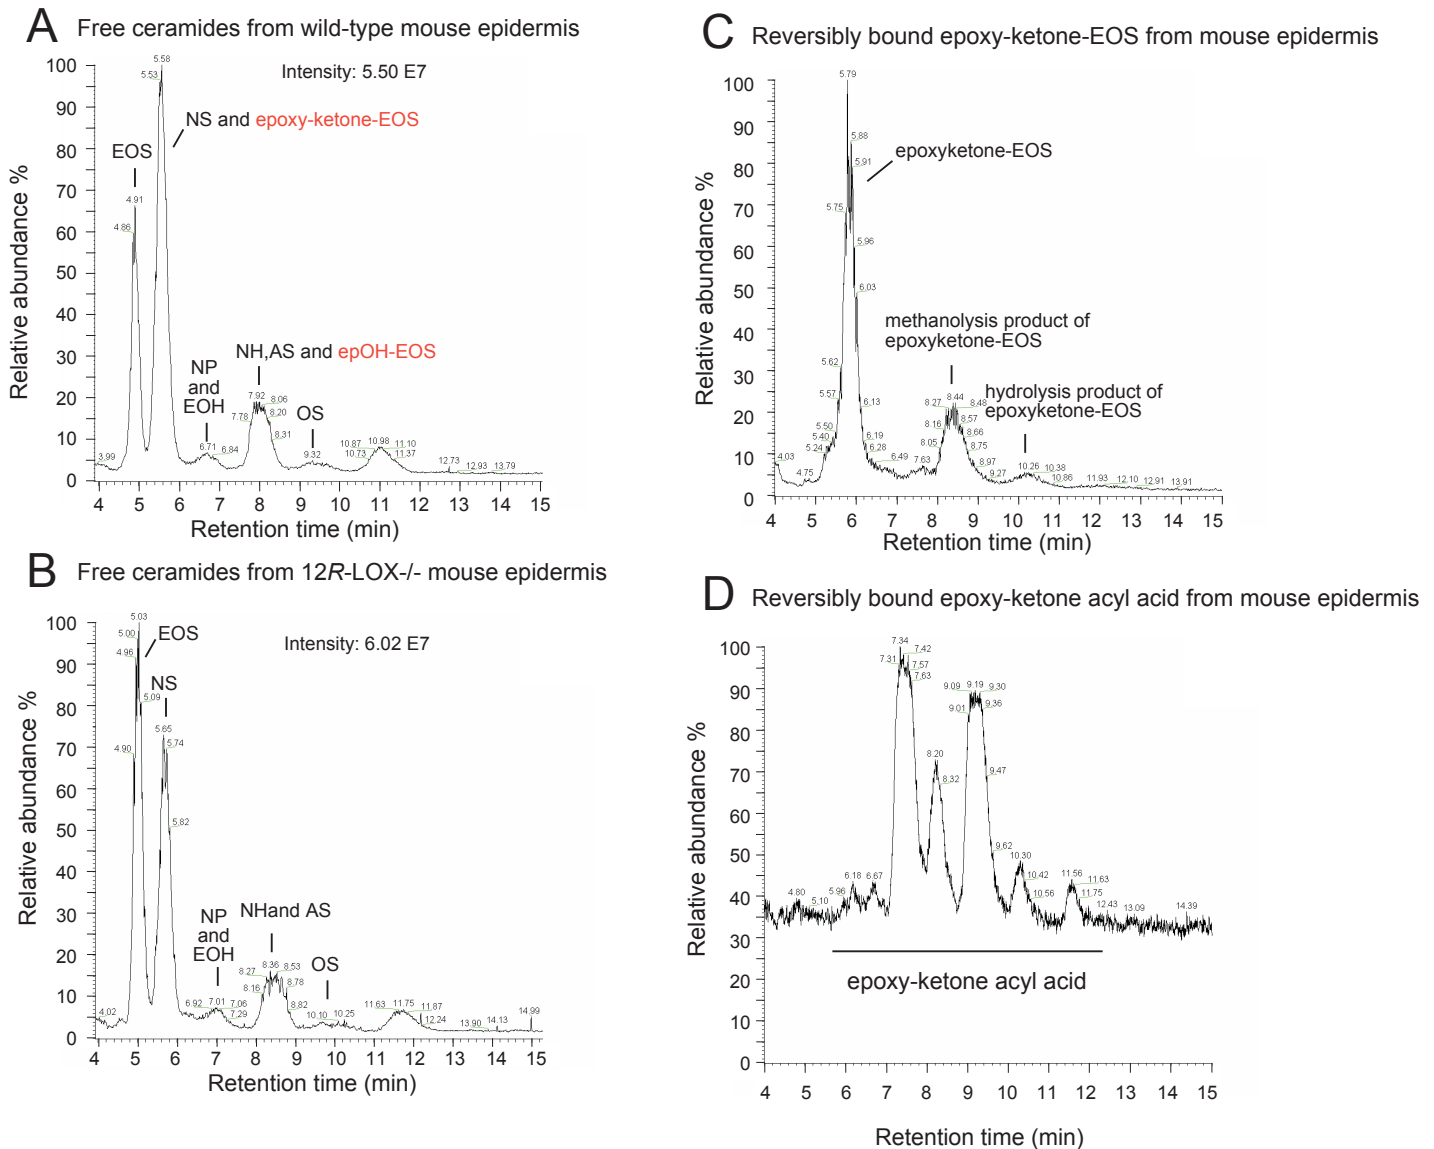

**Fig. S4: Analysis of free and reversibly bound lipids from mouse epidermis.** (A) and (B): Total ion current of SP-HPLC-APCI-MS analysis of free ceramides from wild-type and 12R-LOX<sup>-/-</sup> mouse epidermis respectively. The same aliquot was injected in this wild-type vs. 12R-LOX<sup>-/-</sup> comparison. (C) Total ion current of SP-HPLC-APCI-MS analysis of reversibly bound epoxy-ketone-EOS from wild-type mouse epidermis. (D) Total ion current of RP-HPLC-ESI-MS analysis of reversibly bound epoxy-ketone acyl acid from wild-type mouse epidermis.

(Figure S4 contd on next page)

(E) Mass spectrum of EOS from mouse epidermis. (F) Mass spectrum of free epoxy-ketone-EOS from mouse epidermis. (G) Mass spectrum of free epOH-EOS from mouse epidermis. Note the pattern similarity between this spectrum and the spectrum of free epoxy-ketone-EOS in (F). (H) Mass spectrum of reversibly bound epoxy-ketone-EOS from mouse epidermis. (I) Mass spectrum of reversibly bound epoxy-ketone acyl acid from mouse epidermis.



Figure S4-continued

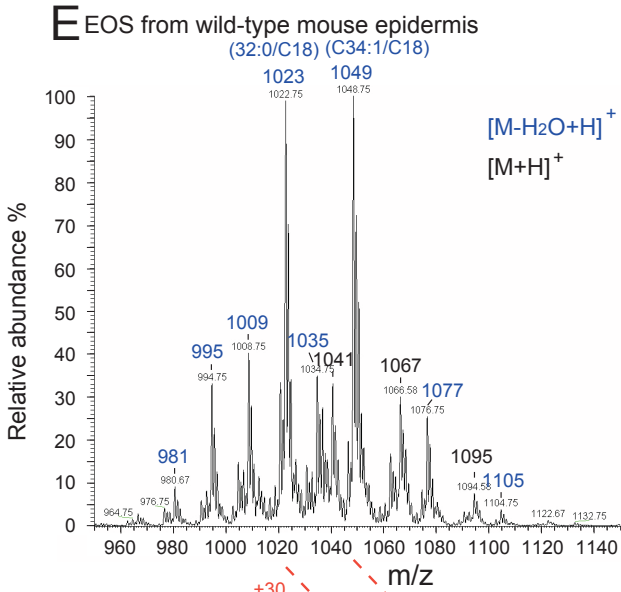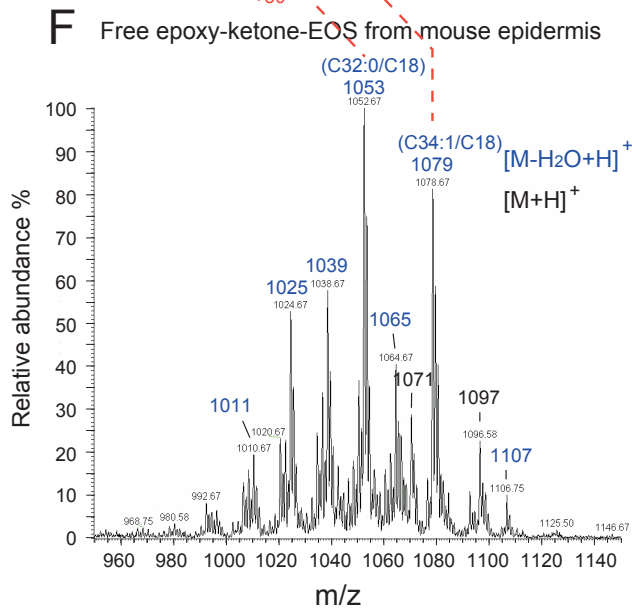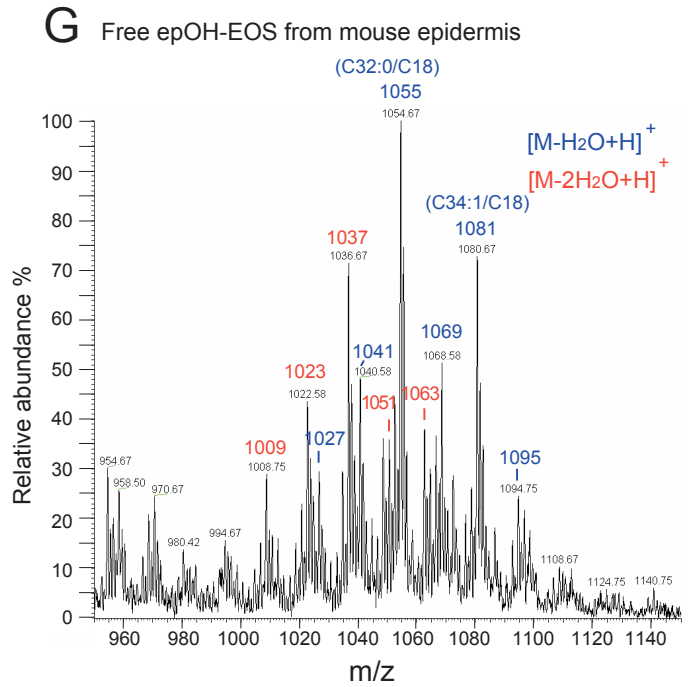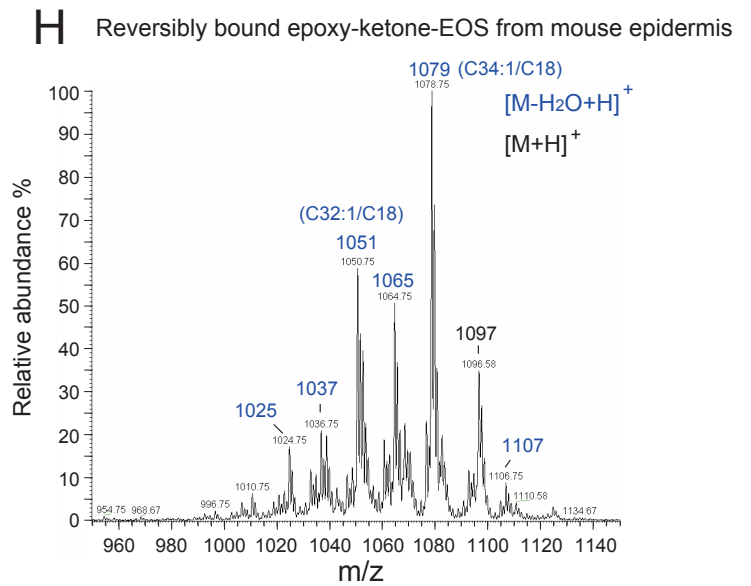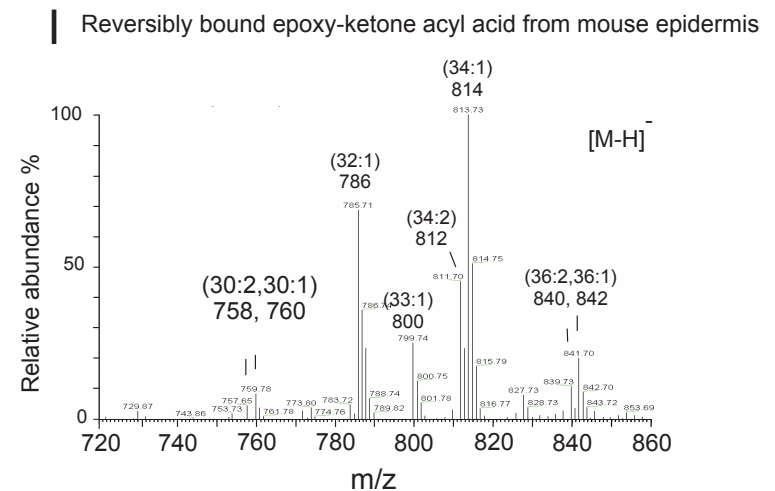

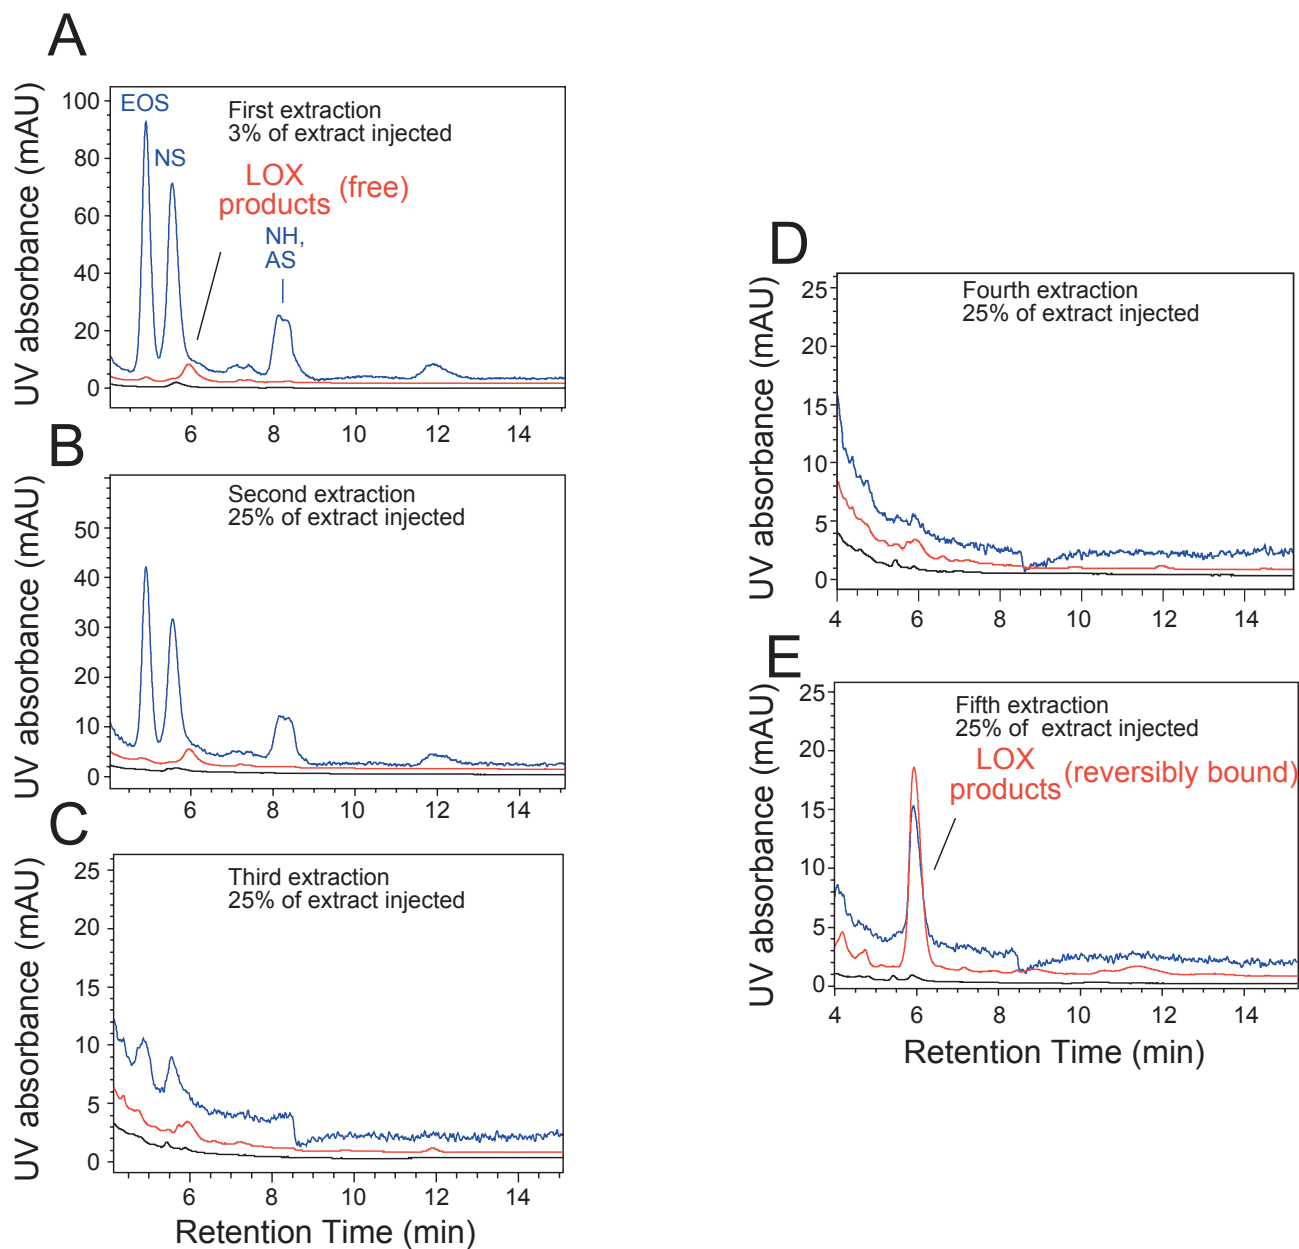

**Fig S5: Stepwise extraction of mouse epidermis reveals lipids reversibly bound to proteins.** (A)-(D): First to fourth sonication and extraction by chloroform:methanol (1:1 for A and B, or 2:1 for C and D, v/v) at 0 °C. Sonication lasted for 20 min each time (20 s sonication followed by 20 s interval). After each extraction, the organic phase was removed from the protein pellet by centrifugation. (E): A final soak of the protein pellet in chloroform:methanol (1:1, v/v) at room temperature overnight. For the first extraction, 3% of total extract was injected onto HPLC; for the next four extractions, 25% of total extract was injected. This experiment used epidermis isolated from two neonatal (P0) BALB/c mice.

Figure S6

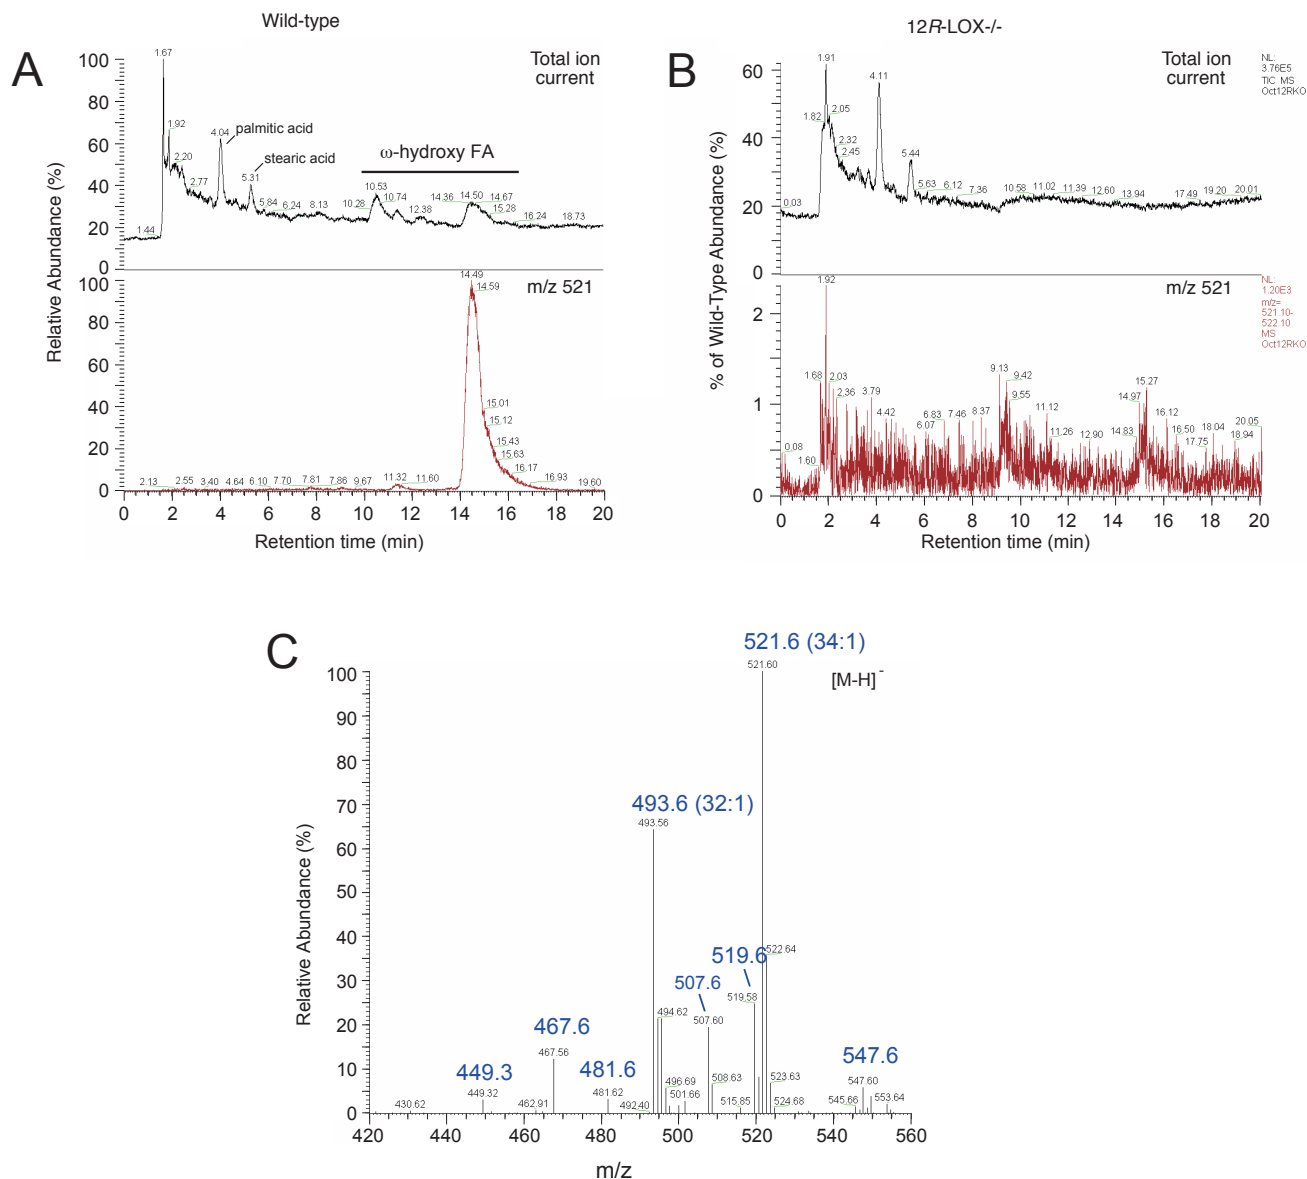

**Fig. S6: Analysis of covalently bound FA and  $\omega$ -hydroxy VLFA from mouse epidermis.** (A) and (B): Total ion current of RP-HPLC-ESI-MS analysis of covalently bound lipids from wild-type and 12R-LOX<sup>-/-</sup> mouse epidermis respectively. The covalently bound lipids was recovered from mild alkaline hydrolysis of exhaustively extracted protein pellets. (C) Combined mass spectra of  $\omega$ -hydroxy VLFA from wild-type epidermis.

**Table S1. <sup>1</sup>H-NMR spectrum of 9*R*,10*R*-trans-epoxy-10*E*-13*R*-hydroxy-octadecenoate methyl ester.** The spectrum (600 MHz) was acquired at room temperature in d<sub>6</sub>-benzene solvent.

This epoxyalcohol is formed by eLOX3 reaction with 9*R*-HPODE esters, it occurs naturally in pig and mouse epidermis as EpOH-EOS, and it corresponds to the first of four 9,10-*trans*-epoxy-13-hydroxy isomers formed by hematin treatment of 9-HPODE (see Fig 3C, main text).

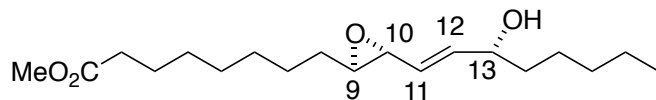

| Chemical shift | Multiplicity | Assignment, coupling constant                                                             |
|----------------|--------------|-------------------------------------------------------------------------------------------|
| 5.79           | dd           | H12 $J_{11,12} = 15.5 \text{ Hz}, J_{12,13} = 5.9 \text{ Hz}$                             |
| 5.43           | ddd          | H11 $J_{11,12} = 15.5 \text{ Hz}, J_{10,11} = 7.8 \text{ Hz}, J_{11,13} = 1.3 \text{ Hz}$ |
| 3.88           | m            | H13                                                                                       |
| 3.37           | s            | -OCH <sub>3</sub>                                                                         |
| 2.98           | dd           | H10 $J_{9,10} = 2.0 \text{ Hz}, J_{10,11} = 7.8 \text{ Hz}$                               |
| 2.67           | dt           | H9 $J_{9,10} = 2.0 \text{ Hz}, J_{8,9} = 5.5 \text{ Hz}$                                  |
| 2.11           | t            | H2                                                                                        |
| 1.53           | quintet      | H3                                                                                        |
| 1.35-1.45      | m            | H8, 14                                                                                    |
| 1.25           | m            | H17                                                                                       |
| 1.0-1.30       | m            | H4, H5, H6, H7, H16, H15                                                                  |
| 0.95           | d            | OH (at C13)                                                                               |
| 0.88           | t            | H18                                                                                       |

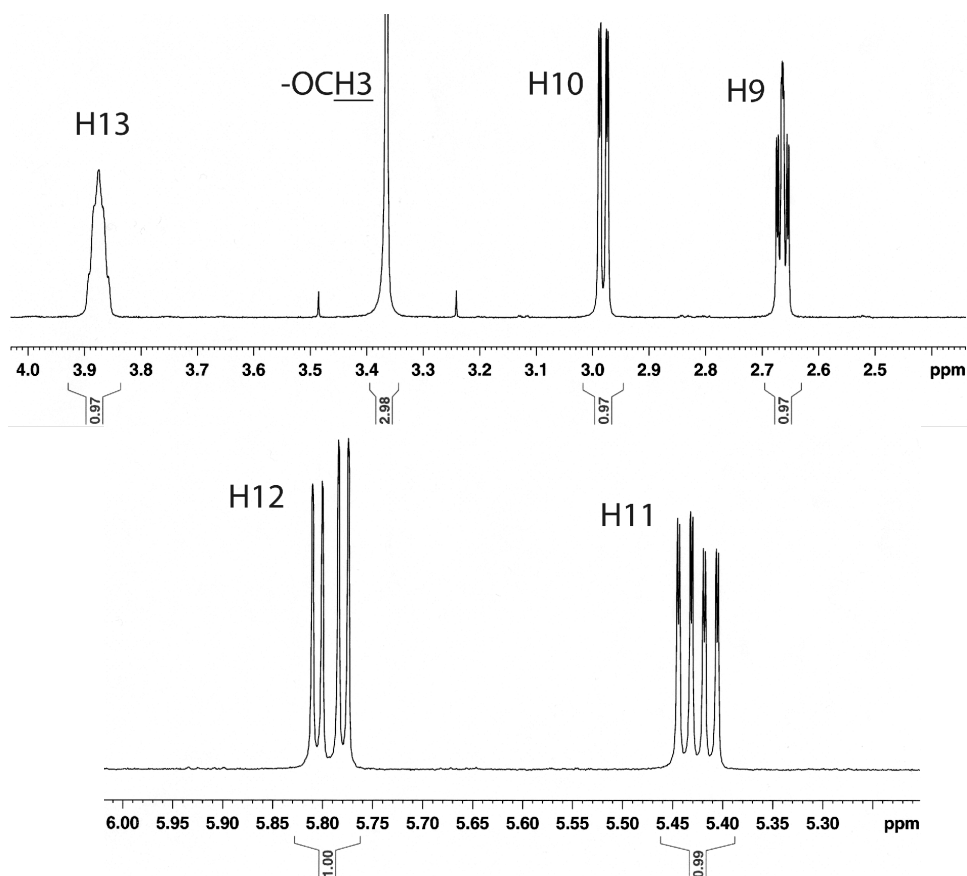

Supplement: supp_M111.251496_jbc.M111.251496-1.pdf [file supp_M111.251496_jbc.M111.251496-1.pdf]
